# Supplementary material
Source: PubMed Central journal article supplement (PMC2493248)
Supplement: supp_190_15_5472__1.pdf [file supp_190_15_5472__1.pdf]

## SUPPLEMENTARY DATA

### Supplementary Figure 1

|          |       |                   |                   |                   |                   |                   |                   |                   |                   |        |        |
|----------|-------|-------------------|-------------------|-------------------|-------------------|-------------------|-------------------|-------------------|-------------------|--------|--------|
| <b>A</b> | 1     | MGAIESRKLL        | ASET              | PVGQFI            | PYSH              | HVTDTI            | ISTK              | <b>NAEYLS</b>     | <b>VWKIDGRSHQ</b> |        |        |
|          | 51    | <b>SASEADVFQW</b> | <b>IRELNNTLRG</b> | ISSAN             | LSLWT             | HIVRRR            | <b>VYEY</b>       | <b>PDAEFDNVFC</b> |                   |        |        |
|          | 101   | <b>RQLDEKYRES</b> | <b>FTGYNLMVND</b> | <b>LYLTVVYRPV</b> | <b>SDKVLSFFAK</b> | RERET             | PDQKK             |                   |                   |        |        |
|          | 151   | HRQES             | CIKAL             | EDINR             | TILGQS            | FKRYG             | AELLS             | <b>VYEKGGHAFS</b> | <b>APLEFLARLV</b> |        |        |
|          | 201   | <b>NGEHIPMPIC</b> | <b>RDRFSDYMAV</b> | <b>NRPMF</b>      | <b>SKWGE</b>      | <b>VGELR</b>      | SLTGL             | RRFG              | MLEIRE            |        |        |
|          | 251   | YDDATE            | PGQL              | NVLLES            | DYEF              | VLTHS             | FSVLS             | RPAAKE            | YLQR              | HQKN   | LIDARD |
|          | 301   | <b>VATDQIEEID</b> | <b>EALNQLISGH</b> | <b>FVMGE</b>      | <b>HHCTL</b>      | <b>TVYGETVQOV</b> | <b>RDNLAHASAA</b> |                   |                   |        |        |
|          | 351   | MLDVA             | VLPKP             | VDLAL             | EAGYW             | AQLPA             | NWQWR             | PRPAP             | ITSLN             | FLSFS  | PFHNF  |
|          | 401   | MSGK              | PTGNPW            | GPAVT             | IILK              | <b>TV</b>         | <b>SGTPLYFNFH</b> | <b>ASKEEEDATD</b> | <b>KRLLGNTMLI</b> |        |        |
|          | 451   | <b>GQSSSGKTVL</b> | <b>LGFLLAQAQK</b> | <b>FKPTIVAFDK</b> | <b>DRGMEISIRA</b> | <b>MGGRYLPLKT</b> |                   |                   |                   |        |        |
|          | 501   | <b>GEP</b>        | <b>SGFNPFQ</b>    | <b>LPPT</b>       | <b>HANLIF</b>     | <b>LKQFVKKLAA</b> | <b>AGGEVTHRDE</b> | <b>EEIDQAITAM</b> |                   |        |        |
|          | 551   | <b>MSDSIDKSLR</b> | <b>RLSLLLQFLP</b> | <b>NPRSDDMDAR</b> | <b>PTVHARLVKW</b> | <b>CEGGDYGWLF</b> |                   |                   |                   |        |        |
|          | 601   | <b>DNPTDALDLS</b> | <b>THQIYGF</b>    | <b>DIT</b>        | <b>EFLDNPEART</b> | <b>PVMYLLYRT</b>  | <b>ESMIDGRRFM</b> |                   |                   |        |        |
|          | 651   | YVFDE             | FWKPL             | QDEYF             | FEDLAK            | NKQKT             | IRKQN             | GIFVF             | FATQEP            | SDALE  | SNIAK  |
|          | 701   | <b>TLIQQC</b>     | <b>ATYI</b>       | <b>FLANPKADYE</b> | <b>DYTQGFKLTD</b> | <b>SEFELVRGLG</b> | <b>EFSRRFLIKQ</b> |                   |                   |        |        |
|          | 751   | <b>GDQSALAEMN</b> | <b>LGKFR</b>      | <b>TIVDG</b>      | <b>ETVERDFDDE</b> | <b>LLVLSGTPDN</b> | <b>AEIAESIIAE</b> |                   |                   |        |        |
| 801      | VGDDP | AVWLP             | IFLDR             | VKAER             | SDV               |                   |                   |                   |                   |        |        |
| <b>B</b> | 1     | MGAIESRKLL        | ASET              | PVGQFI            | PYSH              | HVTDTI            | ISTK              | NAEYLS            | VWKIDGRSHQ        |        |        |
|          | 51    | SASEADVFQW        | IRELNNTLRG        | ISSANLSLWT        | HIVRRRVY EY       | PDAEFDNVFC        |                   |                   |                   |        |        |
|          | 101   | RQLDEKYRES        | FTGYNLMVND        | LYLTVVYRPV        | SDKVLSFFAK        | RERETPDQKK        |                   |                   |                   |        |        |
|          | 151   | HRQESCIKAL        | EDINRNLGQS        | FKRYGAELLS        | <b>VYEKGGHAFS</b> | <b>APLEFLARLV</b> |                   |                   |                   |        |        |
|          | 201   | <b>NGEHIPMPIC</b> | <b>RDRFSDYMAV</b> | <b>NRPMF</b>      | <b>SKWGE</b>      | <b>VGELR</b>      | SLTGL             | RRFG              | MLEIRE            |        |        |
|          | 251   | YDDATEPGQL        | NVLLES            | DYEF              | VLTHS             | FSVLS             | RPAAKE            | YLQR              | HQKN              | LIDARD |        |
|          | 301   | VATDQIEEID        | EALNQLISGH        | FVMGEHHCTL        | TVYGETVQOV        | RDNLAHASAA        |                   |                   |                   |        |        |
|          | 351   | MLDVA             | VLPKP             | VDLAL             | EAGYW             | AQLPA             | NWQWR             | PRPAP             | ITSLN             | FLSFS  | PFHNF  |
|          | 401   | MSGKPTGNPW        | GPAVTIILK         | <b>TV</b>         | <b>SGTPLYFNFH</b> | <b>ASKEEEDATD</b> | <b>KRLLGNTMLI</b> |                   |                   |        |        |
|          | 451   | <b>GQSSSGKTVL</b> | <b>LGFLLAQAQK</b> | <b>FKPTIVAFDK</b> | <b>DRGMEISIRA</b> | <b>MGGRYLPLKT</b> |                   |                   |                   |        |        |
|          | 501   | <b>GEP</b>        | <b>SGFNPFQ</b>    | <b>LPPT</b>       | <b>HANLIF</b>     | <b>LKQFVKKLAA</b> | <b>AGGEVTHRDE</b> | <b>EEIDQAITAM</b> |                   |        |        |
|          | 551   | <b>MSDSIDKSLR</b> | <b>RLSLLLQFLP</b> | <b>NPRSDDMDAR</b> | <b>PTVHARLVKW</b> | <b>CEGGDYGWLF</b> |                   |                   |                   |        |        |
|          | 601   | <b>DNPTDALDLS</b> | <b>THQIYGF</b>    | <b>DIT</b>        | <b>EFLDNPEART</b> | <b>PVMYLLYRT</b>  | <b>ESMIDGRRFM</b> |                   |                   |        |        |
|          | 651   | YVFDEFWKPL        | QDEYFEDLAK        | NKQKTIRKQN        | GIFVFATQEP        | SDALESNIAK        |                   |                   |                   |        |        |
|          | 701   | <b>TLIQQC</b>     | <b>ATYI</b>       | <b>FLANPKADYE</b> | <b>DYTQGFKLTD</b> | <b>SEFELVRGLG</b> | <b>EFSRRFLIKQ</b> |                   |                   |        |        |
|          | 751   | <b>GDQSALAEMN</b> | <b>LGKFR</b>      | <b>TIVDG</b>      | <b>ETVERDFDDE</b> | <b>LLVLSGTPDN</b> | <b>AEIAESIIAE</b> |                   |                   |        |        |
| 801      | VGDDP | AVWLP             | IFLDR             | VKAER             | SDV               |                   |                   |                   |                   |        |        |

**Supplementary Figure 1. Tandem Mass Spectrometry of TrwK.** Selected protein bands were excised manually from the gel and subjected to in-gel digestion with trypsin and analyzed by LC-MS/MS. Obtained spectra were processed using ProteinLynx Global Server and searched against NCBI databases using MASCOT search engine. Amino acid sequences of the bands with  $MW_{app}$  94 kDa (Panel A) and  $MW_{app}$  of 80 kDa (Panel B) in the SDS-PAGE (Fig.1) were identified by peptide fragment fingerprinting as *E. coli* TrwK. Comparison of sequence coverage in Panels A and B shows that fragment B is missing peptides in its N-terminus, suggesting a cleavage site of the protein in aac. 173.

## Supplementary Figure 2

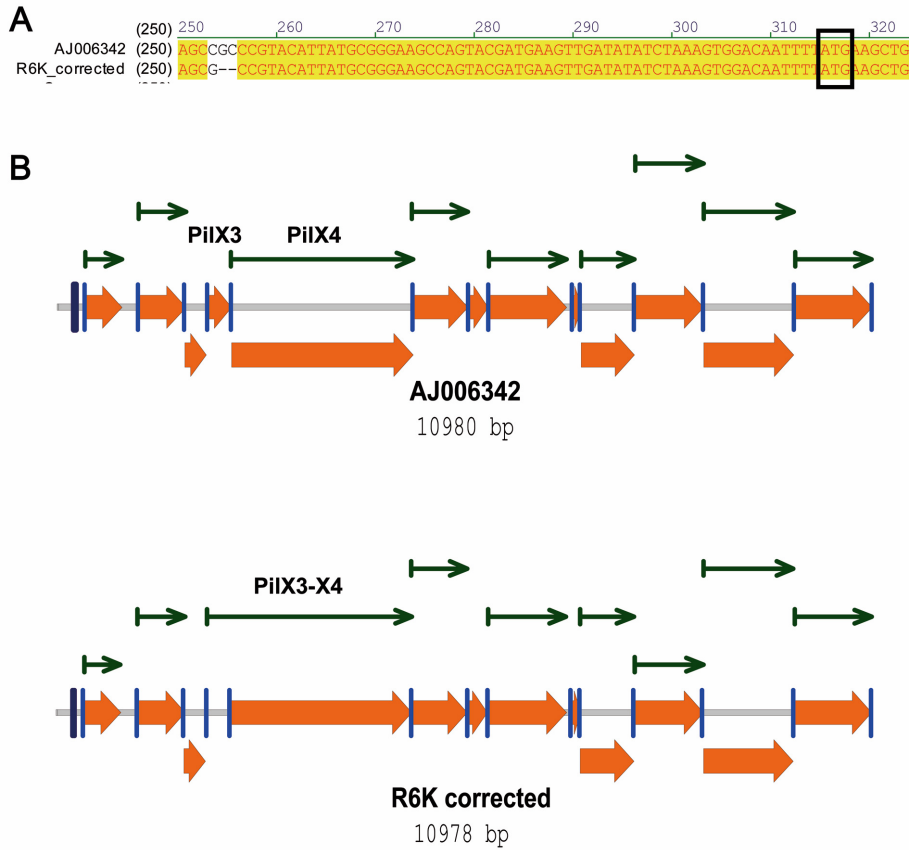

**Supplementary Figure 2. PilX3-PilX4 gene fusion in R6K.** The intergenic region between PilX3 and PilX4 in R6K (accession number AJ006342) was sequenced. An error was found resulting in a bad annotation of the R6K genome (*Panel A*). As a result two genes were annotated instead of only one (*Panel B*). The ATG codon (boxed in Panel A) indicates the N-terminus of PilX4 in previous annotations.
